# Supplementary material for: Target triggered ultrasensitive electrochemical polychlorinated biphenyl aptasensor based on DNA microcapsules and nonlinear hybridization chain reaction
Source: Royal Society of Chemistry journal article supplement (doi:10.1039/d0an00065e), 2020-01-01
Supplement: d0an00065e1.pdf [file d0an00065e1.pdf]

1 **Supporting Information**

2 **Target triggered ultrasensitive electrochemical Polychlorinated biphenyls aptasensor based on DNA**  
3 **microcapsules and nonlinear hybridization chain reaction**

4 *Ting Han, Shaozhen Wang, Feifan Sheng, Sicheng Wang, Tianyue Dai, Xiaojun Zhang, Guangfeng Wang\**

5 Key Laboratory of Chem-Biosensing, Anhui province; Key Laboratory of Functional Molecular Solids, Anhui province; College of  
6 Chemistry and Materials Science, Center for Nano Science and Technology, Anhui Normal University, Wuhu 241000, PR China

7 Corresponding Author: Guangfeng Wang

8 E-mail: wangyuz@mail.ahnu.edu.cn

9 Fax: +86-553-3869303; Tel: +86-553-3869302

10 **Contents**

11 **1. Experimental Procedures**

12 **2. Optimization of Experimental Conditions**

13 **3. Supporting Figures and Tables**

14

15

16

17

18

19

20

21

22

23

24

25

26

27

28

29

30

31

32

33

34

35

## 36 1. Experimental Procedures

37 **Chemicals and Materials.** MB, 4-(2-hydroxyethyl) piperazine-1-ethanesulfonic acid sodium salt  
38 (HEPES base), 4-(2-hydroxyethyl) piperazine-1-ethanesulfonic acid (HEPES acid) and  
39 tris(hydroxymethyl)aminomethane (Tris) were purchased from Sangon Biotech. Co., Ltd. (Shanghai,  
40 China). Poly (allylamine hydrochloride) (PAH, 58 kDa MW) was purchased from Sigma. Sodium  
41 chloride, magnesium chloride, ethylenediaminetetraacetic acid disodium salt dihydrate (EDTA), were  
42 purchased from Sinopharm Chemical Reagent Co., Ltd. (Shanghai, China). 2,2',5,5'-  
43 Tetrachlorobenzidene and 3,3'-dichlorobenzidine, 2,4,4'-Trichlorobiphenyl (PCB-28), 2,2',5,5'-  
44 tetrachlorobiphenyl (PCB-52), 2,3',5,5'-tetrachlorobiphenyl (PCB-72), 2,2',4,5,5'-pentachlorobiphenyl  
45 (PCB-101), and chlorobenzene, were obtained from Sigma–Aldrich. All other chemicals were of  
46 analytical grade and used as received.

47 All DNA sequences were synthesized and subjected to HPLC purification by Sangon Co., Ltd.  
48 (Shanghai, China). The sequences of the synthetic DNA are shown in Table S2. The oligonucleotides  
49 were dissolved in 10 mM HEPES (pH 7.4, containing 500 mM NaCl and 50 mM MgCl<sub>2</sub>) to the desired  
50 concentrations and stored at -20°C.

51 **Apparatus.** CHI 660B electrochemical workstation (Shanghai Chenhua Instruments Co., Shanghai,  
52 China) was employed to accomplish the electrochemical experiments. A conventional three-electrode  
53 configuration was used, with a bare or modified Au electrode (AuE), a saturated calomel electrode (SCE)  
54 as a reference electrode, and a platinum wire as an auxiliary electrode. Scanning electron microscopy  
55 (SEM, Hitachi S4800) observations for the morphological measurements of CaCO<sub>3</sub>. All pH  
56 measurements were measured with a Model pHs-3c meter (Shanghai, China).

57 **Preparation of MB-loaded CaCO<sub>3</sub> microparticles.** CaCO<sub>3</sub> particles were prepared by a precipitation  
58 reaction between equal amounts of CaCl<sub>2</sub> and Na<sub>2</sub>CO<sub>3</sub> under magnetic stirring at room temperature, as  
59 described previously. CaCO<sub>3</sub> particles loaded with MB, were obtained through coprecipitation by  
60 mixing of CaCl<sub>2</sub> (300 μL, 0.33 M) and Na<sub>2</sub>CO<sub>3</sub> (300 μL, 0.33 M) solution, in the presence of MB (30 μL,  
61 8.0 mg/mL). Deionized water was added to obtain a total volume of 1020 μL. After magnetic stirring for  
62 110 s, the suspension was left for 70 s at room temperature to settle down. The particles were  
63 centrifuged at 900 rpm for 20 s, followed by the removal of the supernatant solution, and the subsequent

64 resuspension of the particles in water. This washing procedure was repeated for three times, to remove  
65 byproducts resulting from the precipitation reaction.

66 **Assembly of stepwise preparation of the PCB-72 aptamer-cross-linked DNA microcapsules.** CaCO<sub>3</sub>  
67 microparticles (6 mg) were suspended in 300 mL of a 1 mg mL<sup>-1</sup> solution of PAH (in 10 mM HEPES,  
68 pH 7.4, containing 500 mM NaCl and 50 mM MgCl<sub>2</sub>) under continuously shaking. After an adsorption  
69 time-interval of 20 min, the particles were washed twice with 10 mM HEPES buffer (pH 7.4, containing  
70 500 mM NaCl) followed by centrifuging at 900 rpm for 20 s. Subsequently, the obtained PAH-modified  
71 CaCO<sub>3</sub> microparticles were coated by sequential incubation of the particles in DNA solutions (S1  
72 promoter nucleic acids was 10 mM) and kept under continuous shaking for an adsorption time interval  
73 of 30 min. After this adsorption step, once washing step was performed to remove the non-adsorbed  
74 nucleic acids. And then use the S2 (2 μM) repeat the above operation. After the assembly of the DNA  
75 shells, the template cores were dissolved by adding 0.5 M EDTA (pH 6.0) to yield a solution with the  
76 final concentration of 0.1 M EDTA for 1 h under gentle rotation. After the suspension became clear, the  
77 supernatant EDTA solution was removed through slow centrifugation to avoid aggregation of the DNA  
78 capsules. The capsules were washed three times with 10 mM HEPES buffer (pH 7.4, containing 500  
79 mM NaCl) by centrifuging at 500 rpm for 20 min. The DNA assembled capsules was stored at 4 °C in  
80 HEPES buffer for further use (100 μL).

81 **Pretreatment of the GE.** Before the preparation of the aptasensor, the gold working electrode was first  
82 immersed in piranha solution at 90 °C for 5 min for chemical pretreatment, followed by adequate  
83 washing with ultrapure water. Subsequently, the electrode was polished sequentially with 1.0, 0.3 and  
84 0.05 μm alumina and sonicated in ethanol and ultrapure water for 3 min each. Afterwards, the electrode  
85 was voltammetrically cycled in 0.1 M H<sub>2</sub>SO<sub>4</sub> with the potential between -0.2 and 1.5 V at 0.1 V s<sup>-1</sup> until  
86 a representative steady-state cyclic voltammogram was obtained. After being dried with pure nitrogen  
87 gas, the electrode was immediately used for the DNA immobilization.

88 **Preparation of DNA dendrimers for NHCR reaction nanoprobe.** All oligo DNA were dissolved in  
89 10 mM HEPES (pH 7.4, containing 500 mM NaCl and 50 mM MgCl<sub>2</sub>). Preparation of the sensor  
90 includes the following steps: at first, the immobilization of DNA onto the pre-cleaned electrode was  
91 performed as follows: 100 μL 0.1 μM of the S3 in immobilization buffer was heated to 90 °C for 5 min  
92 and then gradually cooled to room temperature. Then, the pre-cleaned electrode was incubated in the  
93 above resulting S3 solution for 10 h at room temperature. After that, the AuE was rinsed with ultrapure

94 water and incubated in 2 mM 6-mercaptohexanol (MCH) in HEPES buffer for 30 min to remove  
95 nonspecific DNA adsorption on the AuE surface. After being thoroughly rinsed with ultrapure water and  
96 dried under N<sub>2</sub> stream, the S3 probe modified AuE (S3/AuE) was stored at 4 °C in HEPES buffer for  
97 further use. the S3/AuE was transferred into the DNA assembled capsules solution for 30 min at 50 °C.  
98 Next, A different concentration of PCB-72 standard solution dissolved in a solution of H<sub>2</sub>O and  
99 dimethylformamide (V:V, 4:1) was pipetted into the solution and stirred for 5 min to provide sufficient  
100 time for the aptamer to bind to PCB-72, then the DNA microcapsules is open and the released S2 is  
101 complementary with S3 to obtain the double-stranded substrate modified electrode (S2/S3/GCE). The S4  
102 solution was mixed with S5 solution at molar concentration ratio of 1:1 for 30 min with two steps (0.1  
103 μM). Then the double-stranded substrate modified electrode was incubated with 50 μL mixing solution  
104 containing S4 and S5 in hybridization solution for 20 min. Afterward, equal amounts of S6 and S7 (0.5  
105 μM) were incubated in hybridization solution at 50 °C for 90 mins to produce the carrier of DNA  
106 dendrimer via self-assembly.

107 All the electrochemical experiments were carried out at room temperature. DPV was performed within  
108 the potential range from 0 to - 0.7 V using scan rate 100 mV s<sup>-1</sup>. Different concentrations of the PCB-72  
109 were investigated under the same conditions. The EIS measurements were carried out in a background  
110 solution of 20 mM [Fe(CN)<sub>6</sub>]<sup>3-/4-</sup> containing 0.1 M KCl with a frequency range from 0.1 Hz to 100 kHz.  
111 The amplitude of the applied sine wave potential was 5 mV and the formal potential of the system was  
112 set at +0.22 V.

113 The electrochemical experiments of DPV towards the signal of MB for 5 min without applying any  
114 potential in 3 mL 25 mM HEPES (pH 7.4, containing 100 mM NaCl and 10 mM MgCl<sub>2</sub>). After that, the  
115 electrode was washed with MB-free 25 mM HEPES pH 7.4 for 5 min to remove the physically adsorbed  
116 molecules.

117 **Selectivity study and stability of DNA dendrimers.** The DPV signal was obtained in the presence of  
118 10 ng/L PCB-72, three structural analogues of PCB-72 (PCB-28, PCB-52, and PCB-101) and one  
119 functional analogues of PCB-72 (chlorobenzene) under the same procedure. In addition, the obtained  
120 electrode was sealed and stored at 4 °C. DPV of the electrode was tested once per day and tested for 7  
121 days.

## 122 **2. Optimization of Experimental Conditions**

123 In order to achieve high assay sensitivity, a number of experimental conditions were optimized in  
124 this paper. The optimization of the variables of the system is shown in Fig. S1, including the  
125 concentration of MB, pH value in the process of DNA dendrimer, the incubation temperature and time  
126 of DNA dendrimer formation. The effect of the concentration of MB was investigated due to the  
127 concentration of MB was a crucial parameter influencing the current intensity of MB DNA dendrimers.  
128 As shown in Fig. S2A, with the increasing concentration of MB, the current increases rapidly at first and  
129 then tend to be stable when the concentration of MB is higher than 8 mg/mL. The result is maybe  
130 attributed to the fact that MB wrapped in DNA capsule was a certain value because of that the  
131 concentration of CaCO<sub>3</sub> was a certain value. In this system, the sensitivity can also be influenced by pH  
132 value of the buffer solution. Thus, the value of pH has a vital effect on the efficiency of the assay. Fig.  
133 S2B shows the effect of pH value on the response of the DNA dendrimer modified electrode in HEPES  
134 solution over the pH range from 4.0 to 10.0. Obviously, the current increased followed by the pH value  
135 increased from 4.0 to 7.4. However, when the pH was higher than 7.4, the current decreased rapidly. The  
136 effect of incubation temperature in the NHCR system was studied at varying temperatures ranging from  
137 5 to 70 °C as shown in Fig. S2C. One observes that the currents response increased with the incubation  
138 temperature rising from 5 to 50 °C but then decreased gradually with the incubation temperature  
139 increasing from 50 to 70 °C. The effect of NHCR incubation time was investigated for different time  
140 periods ranging from 10 to 120 min. As we can see from Fig. S2D, the electrochemical response  
141 intensified as the incubation time increased and remained constant to a saturation value after about 90  
142 min, indicating that 90 min incubation time was efficient for the assay.

143

144

145

146

147

148

149

150

151 **3. Supporting Figures and Tables**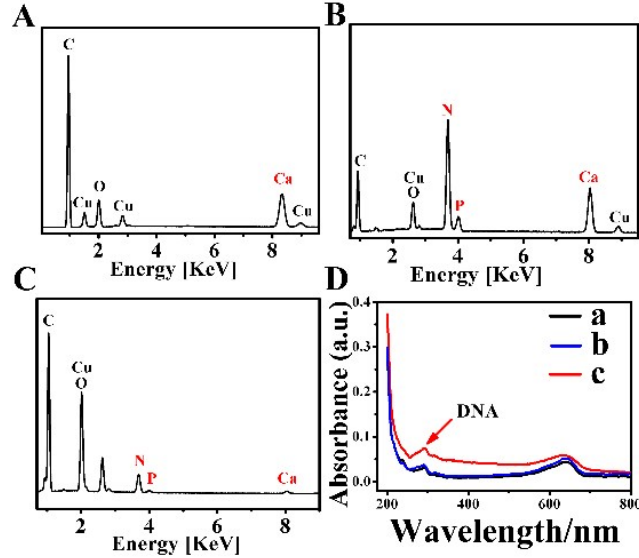

152

153 **Fig. S1** EDS corresponding to uncoated CaCO<sub>3</sub> microparticles (A), DNA-coated CaCO<sub>3</sub> microparticles (B) and154 DNA microcapsules after dissolution of the CaCO<sub>3</sub> core (C), and (D) UV-vis for CaCO<sub>3</sub> microparticles(a), DNA-155 coated CaCO<sub>3</sub> microparticles(b), and DNA microcapsules(c).

156

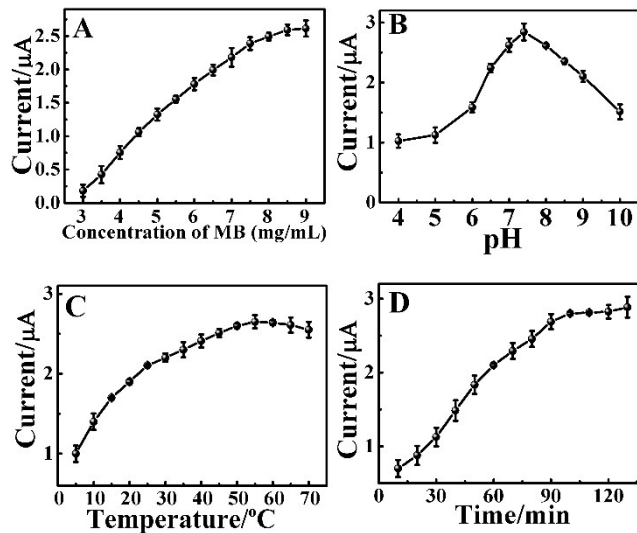

157

158 **Fig. S2** Effect of MB concentration (A), pH value of HEPES (B), incubation temperature of NHCR (C), NHCR

159 incubation time (D) on the sensor system. The error bars were the standard deviation of three repetitive

160 measurements.

161 **Table S1.** List of other electrochemical signal and application.

| <i>Category</i>   | <i>electrochemical signal</i>                        | <i>Method</i>           | <i>Target</i>                         | <i>Reference</i>                    |
|-------------------|------------------------------------------------------|-------------------------|---------------------------------------|-------------------------------------|
| <i>Label</i>      | <i>Alkaline phosphatase (ALP)</i>                    | <i>CV<sup>a</sup></i>   | <i>Influenza virus H5N1</i>           | (Diba et al. 2015) <sup>1</sup>     |
|                   | <i>Ag NPS</i>                                        | <i>DPSV<sup>b</sup></i> | <i>PDGF-BB</i>                        | (Song et al. 2014) <sup>2</sup>     |
|                   | <i>Cu-MOFs</i>                                       | <i>DPV<sup>c</sup></i>  | <i>Lipopolysaccharide</i>             | (Shen et al. 2015) <sup>3</sup>     |
|                   | <i>Fc-SiNPs</i>                                      | <i>CV</i>               | <i>Cardiac troponin I</i>             | (Jo et al. 2015) <sup>4</sup>       |
|                   | <i>MB</i>                                            | <i>CV</i>               | <i>Ochratoxin A</i>                   | (Tan et al. 2015) <sup>5</sup>      |
| <i>Label-free</i> | <i>FGO@Fe-MOG</i>                                    | <i>EIS<sup>d</sup></i>  | <i>Thrombin</i>                       | (Urbanova et al. 2018) <sup>6</sup> |
|                   | <i>[Ru(NH<sub>3</sub>)<sub>6</sub>]<sup>3+</sup></i> | <i>CC<sup>e</sup></i>   | <i>Adenosine</i>                      | (Shen et al. 2017) <sup>7</sup>     |
|                   | <i>Graphene</i>                                      | <i>DPV</i>              | <i>17<math>\beta</math>-estradiol</i> | (Liu et al. 2019) <sup>8</sup>      |
|                   | <i>Fe<sub>3</sub>O<sub>4</sub>@Au</i>                | <i>EIS</i>              | <i>Aflatoxin B1</i>                   | (Wang et al. 2018) <sup>9</sup>     |
|                   | <i>rGO/NB/AuNPs</i>                                  | <i>CV</i>               | <i>Dopamine</i>                       | (Jin et al. 2018) <sup>10</sup>     |

162

163 <sup>a</sup> Cyclic voltammetry164 <sup>b</sup> Differential pulse stripping voltammetric165 <sup>c</sup> Differential pulse voltammetric166 <sup>d</sup> Electrochemical impedance spectroscopy167 <sup>e</sup> Chronocoulometry

168

169

170

171

172

173

174



175 **Table S2.** Oligonucleotides sequence used in this work. DNA drawn in the same color are either identical or  
 176 complementary. Underline is the DNA aptamer.

| Oligonucleotide | Sequence (5'-3')                                                                                                                |
|-----------------|---------------------------------------------------------------------------------------------------------------------------------|
| Aptamer(S1)     | <u><sup>a</sup>TTT-TTC-ACT-CGG-ACC-CCA-TTC-TCC-TTC-CAT-CCC-TCA-TCC-GTC-CAC-CAT-CAA-CTA-GTT</u>                                  |
| sDNA 2(S2)      | AAC-TAG-TTG-ATG-AAG-CTG-GAC-ATAA-TAG-GCA-CAC-GAC-ATAA-TAG-GCA-CAC-                                                              |
| sDNA 3(S3)      | GTG-TGC-CTA-TTA-TGT-CTC-CTC-CTG-TGT-GCC-TAT-TAT-GTC-TCC-TCC-TCA-GCT-TCA-TCA-ACT-AGT-TCG-TCA-(CH <sub>2</sub> ) <sub>6</sub> -SH |
| Trigger(S4)     | TGA-CGA-ACT-AGT-TGA-TGA-AGC-TG                                                                                                  |
| sDNA 5(S5)      | GTGCCTATTATGTCGTGTCCTATTATGTCCAGCTT                                                                                             |
| sDNA 6(S6)      | AGGAGGAGACATAATAGGCACACTGACGAACTAGTTGATGAA<br>GCTG                                                                              |
| sDNA 7(S7)      | GTG-TGC-CTA-TTA-TGT-CTC-CTC-CTG-TGT-GCC-TAT-TAT-GTC-TCC-TCC-TCA-GCT-TCA-TCA-ACT-AGT-TCG-TCA                                     |

177 <sup>a</sup> The underlined part is the aptamer recognition sequence of PCB-72

178

179

180

181

182

183

184

185 **Table S3.** Comparison between the proposed assay and other reported methods for the aptasensing of PCB

| <i>Method</i>                                            | <i>Linear range<br/>(ng/mL)</i> | <i>Detection Limit<br/>(ng/mL)</i> | <i>Reference</i>                          |
|----------------------------------------------------------|---------------------------------|------------------------------------|-------------------------------------------|
| GC-MS                                                    | 0.02-250                        | 0.03                               | (Ozcan, et al. 2009) <sup>11</sup>        |
| Fluorescence aptasensor                                  | 0.1–100                         | 1.0                                | (Xu, et al. 2012) <sup>12</sup>           |
| PFC-based self-powered<br>sensor                         | 10 - 1000                       | 4.5                                | (Yan, et al. 2018) <sup>13</sup>          |
| Ultra-performance liquid<br>chromatography               | 10-3000                         | 10                                 | (Ramanujam, et al.<br>2017) <sup>14</sup> |
| Colorimetry aptasensor                                   | 0.5–900 nM                      | 0.05 nM                            | (Cheng, et al. 2018) <sup>15</sup>        |
| SERS aptasensor                                          | 10 nM–10 M                      | $3.3 \times 10^{-8}$ M             | (Sun, et al. 2016) <sup>16</sup>          |
| Electrochemical<br>immunosensors                         | 10-10000                        | 10                                 | (Serena, et al. 2000) <sup>17</sup>       |
| UCNPs-HCR<br>Fluorescence aptasensor                     | 0.004-800                       | 0.0035                             | (Wang, et al. 2018) <sup>18</sup>         |
| CaCO <sub>3</sub> -nHCR<br>Electrochemical<br>aptasensor | 0.001-1000                      | 0.001                              | This work                                 |

186

187

188

189

190

191

192

193

## 194 REFERENCES

- 195 1. F. S. Diba, S. Kim and H. J. Lee, *Biosens Bioelectron*, 2015, **72**, 355-361.  
196 2. W. Song, H. Li, H. Liang, W. Qiang and D. Xu, *Anal Chem*, 2014, **86**, 2775-2783.  
197 3. W. J. Shen, Y. Zhuo, Y. Q. Chai and R. Yuan, *Anal. Chem.*, 2015, **87**, 11345-11352.  
198 4. H. Jo, H. Gu, W. Jeon, H. Youn, J. Her, S. K. Kim, J. Lee, J. H. Shin and C. Ban, *Anal. Chem.*,  
199 2015, **87**, 9869-9875.  
200 5. Y. Tan, X. Wei, Y. Zhang, P. Wang, B. Qiu, L. Guo, Z. Lin and H. H. Yang, *Anal. Chem.*, 2015,  
201 **87**, 11826-11831.  
202 6. V. Urbanova, K. Jayaramulu, A. Schneemann, S. Kment, R. A. Fischer and R. Zboril, *ACS Appl.*  
203 *Mater. Interfaces.*, 2018, DOI: 10.1021/acsami.8b14344.  
204 7. J. Nie, L. Yuan, K. Jin, X. Han, Y. Tian and N. Zhou, *Biosens. Bioelectron.*, 2018, **122**, 254-262.  
205 8. M. Liu, H. Ke, C. Sun, G. Wang, Y. Wang and G. Zhao, *Talanta*, 2019, **194**, 266-272.  
206 9. C. Wang, J. Qian, K. An, C. Ren, X. Lu, N. Hao, Q. Liu, H. Li, X. Huang and K. Wang, *Biosens.*  
207 *Bioelectron.*, 2018, **108**, 69-75.  
208 10. H. Jin, C. Zhao, R. Gui, X. Gao and Z. Wang, *Anal. Chim. Acta.*, 2018, **1025**, 154-162.  
209 11. S. Ozcan, A. Tor and M. E. Aydin, *Anal. Chim. Acta.*, 2009, **647**, 182-188.  
210 12. S. Xu, H. Yuan, S. Chen, A. Xu, J. Wang and L. Wu, *Anal. Biochem.*, 2012, **423**, 195-201.  
211 13. K. Yan, Y. Zhu, W. Ji, F. Chen and J. Zhang, *Anal. Chem.*, 2018, **90**, 9662-9666.  
212 14. N. Ramanujam, M. Sivaselvakumar and S. Ramalingam, *Biomed Chromatogr*, 2017, **31**.  
213 15. R. Cheng, S. Liu, H. Shi and G. Zhao, *J. Hazard. Mater.*, 2018, **341**, 373-380.  
214 16. K. Sun, Q. Huang, G. Meng and Y. Lu, *ACS Appl. Mater. Interfaces.*, 2016, **8**, 5723-5728.  
215 17. L. Serena, F. Milan, M. Marco, *Electroanalysis* 2000, 1040-0397.  
216 18. Y. Wang, J. Bai, B. Huo, S. Yuan, M. Zhang, X. Sun, Y. Peng, S. Li, J. Wang, B. Ning and  
217 Z. Gao, *Anal. Chem.*, 2018, **90**, 9936-9942.
